# Supplementary material
Source: Springer Nature journal article supplement (https://www.springermedizin.de/resource/supplementary/12889_2007_995_MOESM1_ESM.pdf/9502718)

# Receiver Operating Characteristics (ROC) curves

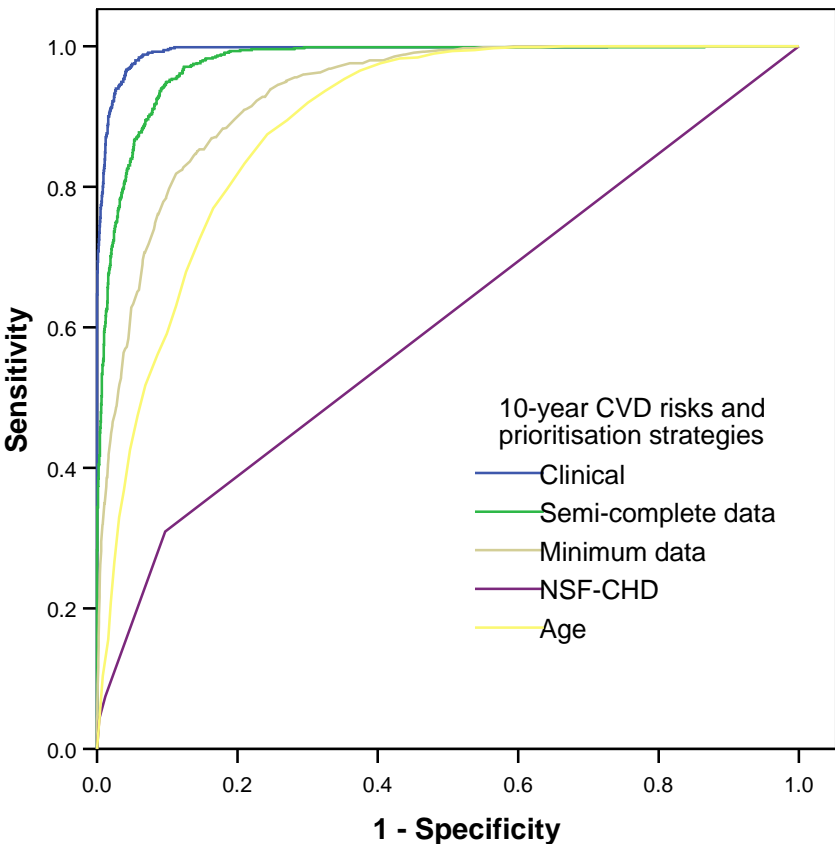

Supplement: MOESM1 [file 9502718]
